# Supplementary material
Source: publisher figshare collection journal article supplement (https://acs.figshare.com/ndownloader/files/3883105)
Supplement: Supplementary file 1 [file 3883105]

# Supporting Information

## **Facile synthesis of hierarchical porous TiO<sub>2</sub> ceramics with enhanced photocatalytic performance for micro-polluted pesticide degradation**

Zipeng Xing<sup>a</sup>, Wei Zhou<sup>a,\*</sup>, Fan Du<sup>a</sup>, Linlin Zhang<sup>a</sup>, Zhenzi Li<sup>c</sup>, Hang Zhang<sup>a</sup>, and Wei Li<sup>b,\*</sup>

<sup>a</sup> Key Laboratory of Functional Inorganic Material Chemistry, Ministry of Education of the People's Republic of China, Key Laboratory of Chemical Engineering Process and Technology for High-Efficiency Conversion, College of Heilongjiang Province, Department of Environmental Science, Heilongjiang University, Harbin 150080, P. R. China

E-mail: zwmater@gmail.com

<sup>b</sup> Department of Chemistry, and Laboratory of Advanced Materials, Fudan University, Shanghai 200433, P. R. China, E-mail: li\_w10@fudan.edu.cn

<sup>c</sup> Department of Epidemiology and Biostatistics, Harbin Medical University, Harbin 150086, People's Republic of China

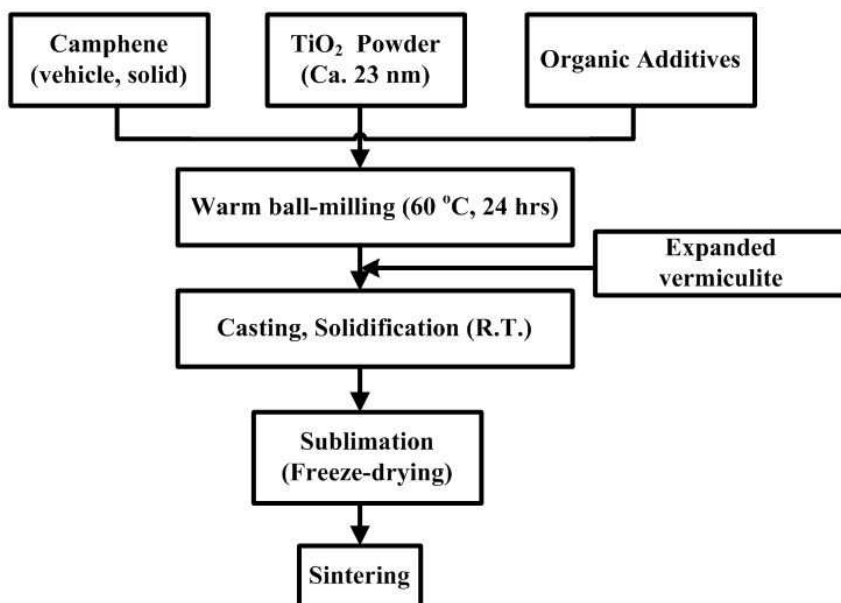

**Figure S1.** Schematic chart of the fabrication procedure.

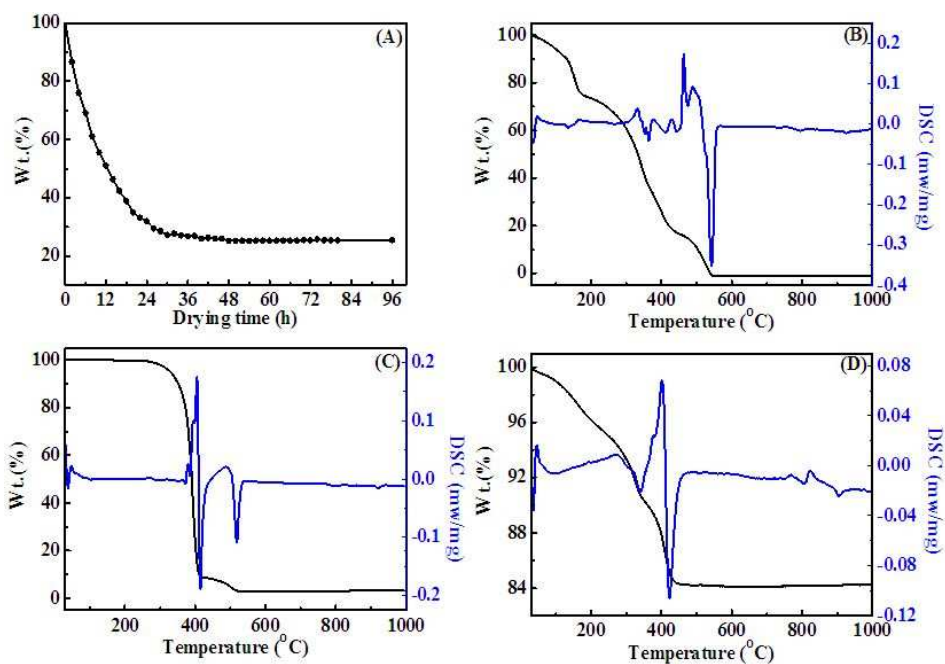

**Figure S2.** (A) Change of the relative weight during freeze-drying of camphene-based green body, (B) TGA analyses of the dispersant, (C) TGA analyses of the binder, (D) TGA analyses of the green body after the freeze-drying.

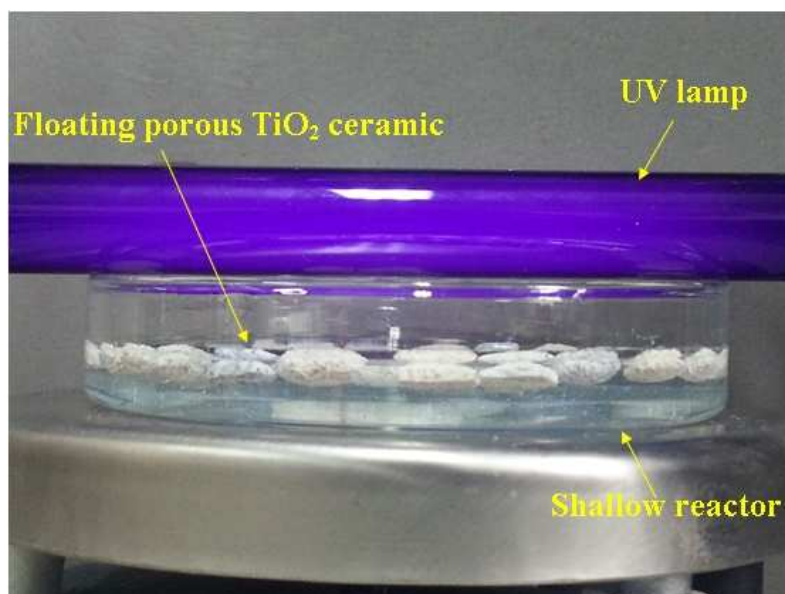

**Figure S3.** Images of floating porous TiO<sub>2</sub> ceramic.

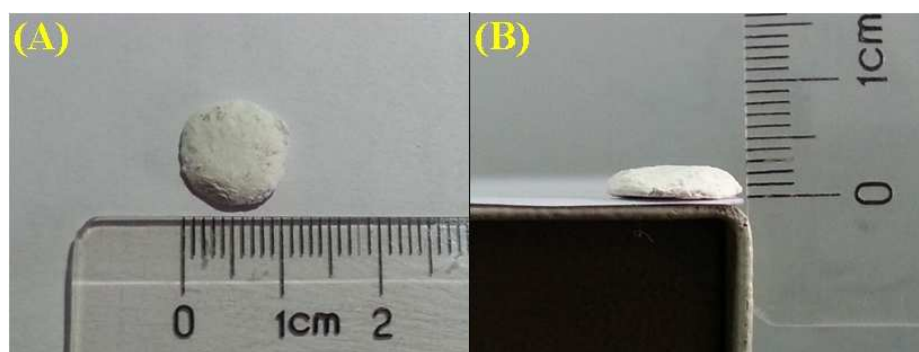

**Figure S4.** Image of floating porous TiO<sub>2</sub> ceramic with single ceramic: (A) vertical view, (B) lateral view.

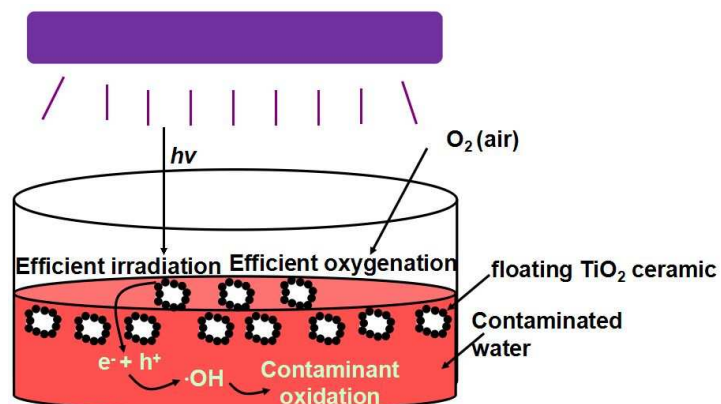

**Figure S5.** Schematic representation of the floating porous TiO<sub>2</sub> ceramic for contaminants oxidation.

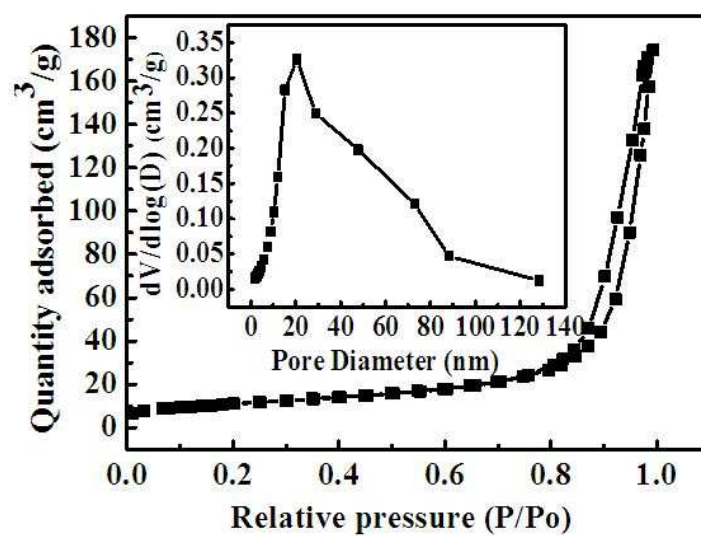

**Figure S6.** Nitrogen adsorption-desorption isotherms and the pore size distribution (insert) of the floating porous TiO<sub>2</sub> ceramic.

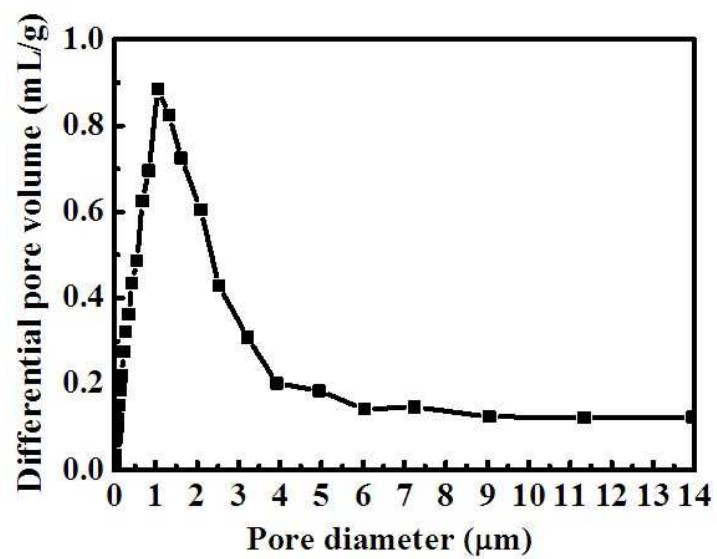

**Figure S7.** The pore size distribution of the floating porous TiO<sub>2</sub> ceramics.
